# Supplementary material
Source: PubMed Central journal article supplement (PMC4117197)
Supplement: NIHMS597448-supplement-Tables_and_figures.pdf [file NIHMS597448-supplement-Tables_and_figures.pdf]

## An *in vitro* microfluidic approach to generating protein-interaction networks

Doron Gerber, Sebastian J Maerkl & Stephen R Quake

Supplementary figures and text:

|                               |                                                       |
|-------------------------------|-------------------------------------------------------|
| <b>Supplementary Figure 1</b> | Experimental design                                   |
| <b>Supplementary Figure 2</b> | GFP calibration curve                                 |
| <b>Supplementary Figure 3</b> | PING has sensitivity of about 1 M                     |
| <b>Supplementary Figure 4</b> | Protein interaction histogram                         |
| <b>Supplementary Table 1</b>  | Description of <i>Streptococcus pneumoniae</i> clones |
| <b>Supplementary Table 2</b>  | Statistical significance of the interactions          |
| <b>Supplementary Table 3</b>  | List of interactions found by PING                    |
| <b>Supplementary Table 4</b>  | Expression levels do not bias the interactions.       |
| <b>Supplementary Methods</b>  |                                                       |

*Note: Supplementary Data is available on the Nature Methods website.*

**Supplementary Figure 1. Experimental design.**

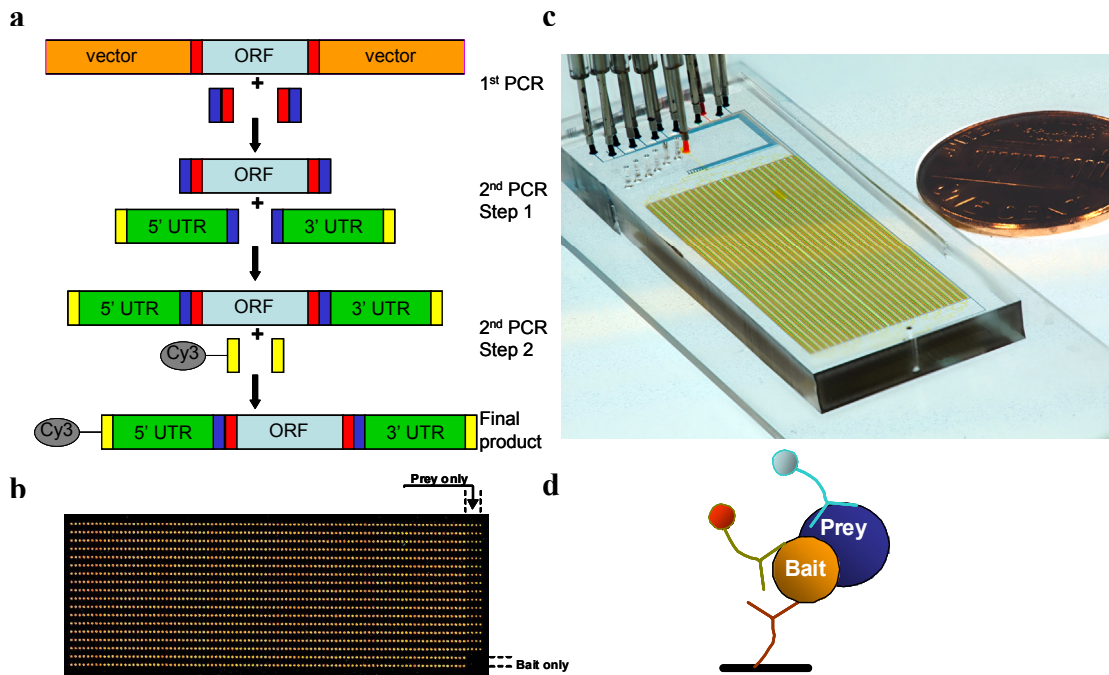

**(a)** ORF was PCR amplified for 30 cycles and extended to overlap with the 5' and 3' UTRs (Blue and Red primers) directly from bacteria, avoiding the need for plasmid purification. A second PCR step (10 cycles) assembled the ORF with the UTRs (step2) to produce an expression ready template. The template was then amplified for 30 cycles using final primers (yellow). A cy3 label was added to allow for quality control of the programmed devices. Hi Fi PCR (Roche) was used to maintain the fidelity of the amplified DNA. **(b)** An example of a DNA array printed on an epoxy glass slide ready for chip mounting. DNA is labeled with Cy3. **(c)** A photograph of a typical device aligned on a glass substrate. Control and flow lines are illustrated with food dyes. **(d)** Pull down / detection scheme for on-chip protein interactions assay. Bait c-terminal tag is used for pull down. Cy3 labeled anti *c-myc* is used to detect protein expression and Alexa<sub>647</sub> labeled antibody is used to detect prey interaction.

## Supplementary Figure 2. GFP calibration curve.

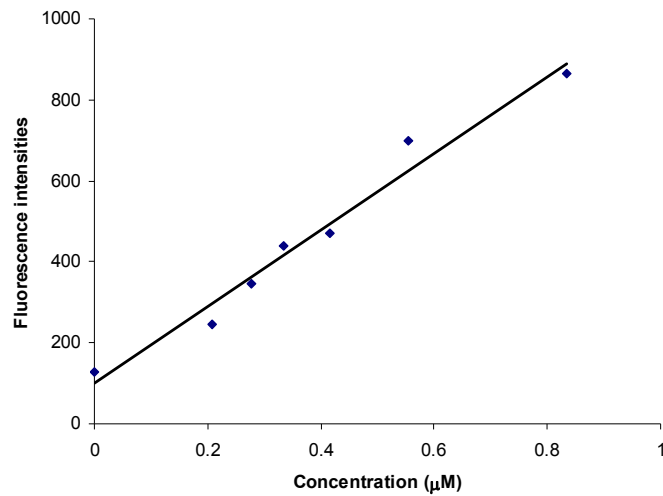

We calibrated the concentration of 4-HIS GFP in the extract using a calibration curve. For this purpose, we used a pure stock of eGFP 1mg/ml (Biovision). The eGFP fluorescence were measured on an RF3501 (Shimadzu) set with excitation at 490nm emission at 512nm and slits set to 10nm. The 4-HIS GFP proteins were measured in the *E. coli* extract in which they were expressed and diluted 10 fold in Hepes 50mM.

**Supplementary Figure 3. PING has sensitivity of about 1  $\mu\text{M}$ .**

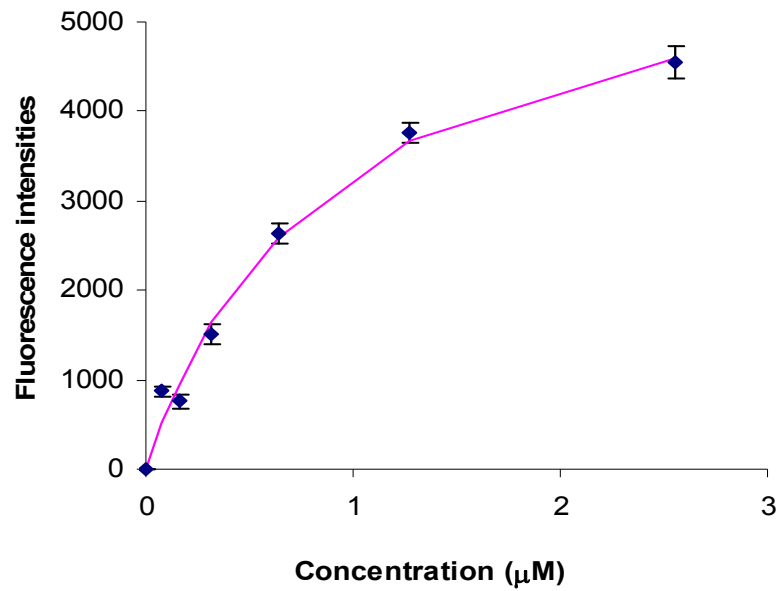

We measured binding of 4-HIS tagged eGFP to the Penta-HIS antibody (Qiagen). A non-linear least square fitting was used to calculate the binding constant  $K_d = 884 \pm 158 \text{ nM}$  ( $R^2 = 0.99$ ; P value  $< 0.003$ ). Each data point represents between 10-20 replicates.

### Supplementary Figure 4. Protein interactions Histogram.

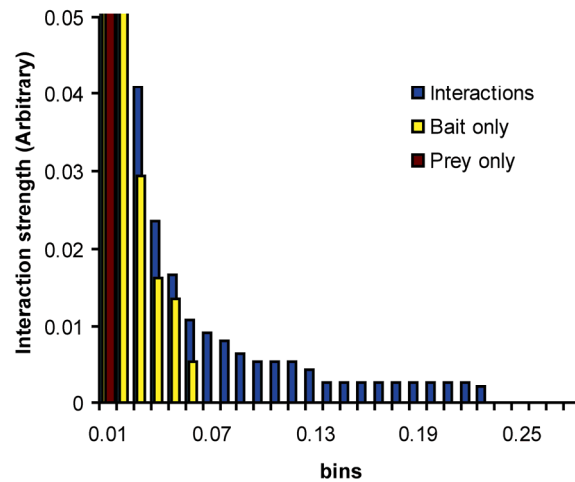

A histogram of the interaction strengths (ratios of interaction/expression signals) demonstrates a cutoff ratio of about 0.07 for non-specific interactions according to bait only expression. Interestingly, this cutoff results in a network of similar size as when no normalization is used.

**Supplementary Table 1 - Description of Streptococcus pneumoniae clones**

| Clone ID | ORF length | Common Name                                    | Gene  | Oligomeric State         |
|----------|------------|------------------------------------------------|-------|--------------------------|
| SP0438   | 300        | glutamyl-tRNA(Gln) amidotransferase, C subunit | gatC  | Heterotrimer             |
| SP1278   | 519        | pyrimidine operon regulatory protein           | pyrR  | Homodimer/Homohexamer    |
| SP1577   | 510        | adenine phosphoribosyltransferase              | apt   | Homodimer                |
| SP1907   | 282        | chaperonin, 10 kDa                             | groES | High Oligomer            |
| SP1699   | 360        | holo-(acyl-carrier protein) synthase           | acpS  | Homotrimer               |
| SP0476   | 342        | PTS system, lactose-specific IIA component     | lacF  | Homotrimer               |
| SP1168   | 462        | mutator MutT protein                           | mutX  | Homotrimer               |
| SP0516   | 522        | heat shock protein GrpE                        | grpE  | Homodimer                |
| SP0959   | 555        | translation initiation factor IF-3             | infC  | Monomer                  |
| SP0766   | 603        | superoxide dismutase, manganese-dependent      | sodA  | Homodimer                |
| SP0261   | 756        | undecaprenyl diphosphate synthase              | uppS  | Homodimer                |
| SP1877   | 738        | integrase/recombinase, phage integrase family  |       | Heterotetramer           |
| SP1875   | 567        | conserved hypothetical protein                 | scpB  | Homodimer                |
| SP0231   | 636        | adenylate kinase                               | adk   | Monomer                  |
| SP0702   | 630        | orotate phosphoribosyltransferase PyrE         | pyrE  | Homodimer                |
| SP1090   | 639        | conserved hypothetical protein                 |       | Homodimer                |
| SP1377   | 675        | 3-dehydroquinone dehydratase                   | aroD  | Homodimer                |
| SP0701   | 699        | orotidine 5-phosphate decarboxylase            | pyrF  | Homodimer                |
| SP1876   | 726        | conserved hypothetical protein                 | scpA  | Monomer?                 |
| SP0669   | 837        | thymidylate synthase                           | thyA  | Homodimer                |
| SP1542   | 1341       | asparaginyl-tRNA synthetase                    | asnS  | Homodimer                |
| SP0436   | 1440       | glutamyl-tRNA(Gln) amidotransferase, B subunit | gatB  | Heterotrimer             |
| SP0437   | 1464       | glutamyl-tRNA(Gln) amidotransferase, A subunit | gatA  | Heterotrimer             |
| SP0289   | 942        | dihydropteroate synthase                       |       | Homodimer and Homotrimer |
| SP1014   | 933        | dihydrodipicolinate synthase                   | dapA  | Homotetramer             |
| SP2112   | 984        | maltose operon transcriptional repressor       | malR  | HTH (dimer)              |
| SP1159   | 1068       | integrase/recombinase, phage integrase family  |       | heterotetramer           |
| SP0519   | 1134       | dnaJ protein                                   | dnaJ  | Homodimer                |
| SP0019   | 1284       | adenylosuccinate synthetase                    | purA  | Homodimer                |
| SP1128   | 1302       | enolase                                        | eno   | Homodimer                |
| SP1371   | 1281       | 3-phosphoshikimate 1-carboxyvinyltransferase   | aroA  | Monomer                  |
| SP0713   | 1473       | lysyl-tRNA synthetase                          | lysS  | Homodimer                |
| SP0764   | 933        | dihydroorotate dehydrogenase A                 | pyrDa | Homodimer                |
| SP0894   | 2271       | X-pro dipeptidyl-peptidase                     | pepX  | Homodimer                |
| SP1631   | 1941       | threonyl-tRNA synthetase                       | thrS  | Homodimer                |
| SP2078   | 1689       | arginyl-tRNA synthetase                        | argS  | Monomer                  |
| SP0292   | 810        | bifunctional folate synthesis protein          |       | Homodimer and Homotrimer |
| SP1103   | 105        | hypothetical protein                           |       | Homodimer                |
| SP1362   | 735        | putative transcriptional regulator MecA        | mecA  | Homodimer                |
| SP1906   | 1620       | chaperonin, 60 kDa                             | groEL | High Oligomer            |
| SP2069   | 1458       | glutamyl-tRNA synthetase                       | gltX  | Monomer                  |
| SP2121   | 1287       | histidyl-tRNA synthetase                       | hisS  | Homodimer                |
| SP2229   | 1023       | tryptophanyl-tRNA synthetase                   | trpS  | Homodimer                |

Clones for the control set were obtained from TIGR ([pfgc.tigr.org](http://pfgc.tigr.org)).

**Supplementary Table 2** - Statistical significance of the interactions

| <b>n1</b>            | <b>n2</b> | <b>U</b> | <b>P (two-tailed)</b>    | <b>P (one-tailed)</b>    |
|----------------------|-----------|----------|--------------------------|--------------------------|
| 1273                 | 25        | 31299    | $<2 \times 10^{-06}$ *   | $<1 \times 10^{-06}$ *   |
| Normal approximation |           | $z=8.29$ | $1.13 \times 10^{-16}$ * | $5.67 \times 10^{-17}$ * |

\* **These values are approximate.**

**Supplementary Table 3** - List of all the interactions found by PING.

| <b>Protein A</b> | <b>Protein B</b> |
|------------------|------------------|
| SP1907           | SP0019           |
| SP1907           | SP0231           |
| SP1907           | SP0261           |
| SP1907           | SP0289           |
| SP1907           | SP0292           |
| SP1907           | SP0436           |
| SP1907           | SP0437           |
| SP1907           | SP0438           |
| SP1907           | SP0516           |
| SP1907           | SP0519           |
| SP1907           | SP0669           |
| SP1907           | SP0701           |
| SP1907           | SP0713           |
| SP1907           | SP0766           |
| SP1907           | SP0959           |
| SP1907           | SP1014           |
| SP1907           | SP1090           |
| SP1907           | SP1103           |
| SP1907           | SP1128           |
| SP1907           | SP1159           |
| SP1907           | SP1168           |
| SP1907           | SP1278           |
| SP1907           | SP1362           |
| SP1907           | SP1371           |
| SP1907           | SP1377           |
| SP1907           | SP1542           |
| SP1907           | SP1577           |
| SP1907           | SP1631           |
| SP1907           | SP1699           |
| SP1907           | SP1875           |
| SP1907           | SP1876           |
| SP1907           | SP1877           |
| SP1907           | SP1906           |
| SP1907           | SP1907           |
| SP1907           | SP2078           |
| SP1907           | SP2112           |
| SP1907           | SP0476           |
| SP0516           | SP0019           |
| SP0516           | SP0261           |
| SP0516           | SP0516           |
| SP0516           | SP0519           |
| SP0516           | SP0959           |
| SP0516           | SP1128           |
| SP0516           | SP1159           |
| SP0516           | SP1168           |
| SP0516           | SP1577           |
| SP0516           | SP1699           |



|        |        |
|--------|--------|
| SP0519 | SP0019 |
| SP0519 | SP0261 |
| SP0519 | SP0519 |
| SP0669 | SP1877 |
| SP0669 | SP0669 |
| SP1014 | SP1014 |
| SP1875 | SP1876 |
| SP1875 | SP1875 |
| SP1875 | SP1377 |
| SP1875 | SP1103 |
| SP1875 | SP0766 |
| SP1875 | SP0261 |
| SP1875 | SP0231 |
| SP0766 | SP1875 |
| SP0766 | SP0766 |
| SP1876 | SP1875 |
| SP1128 | SP0519 |
| SP1128 | SP2069 |
| SP1128 | SP1542 |
| SP1128 | SP1371 |
| SP1128 | SP1159 |
| SP1128 | SP1128 |
| SP1128 | SP0713 |
| SP1128 | SP0437 |
| SP1128 | SP0436 |
| SP1128 | SP0261 |
| SP1128 | SP0019 |
| SP0701 | SP1876 |
| SP0701 | SP1377 |
| SP0701 | SP0701 |
| SP0701 | SP0437 |
| SP0701 | SP0261 |
| SP0701 | SP0019 |
| SP0702 | SP0702 |
| SP2112 | SP0519 |
| SP2112 | SP2112 |
| SP2112 | SP1159 |
| SP2112 | SP0261 |
| SP0289 | SP2112 |
| SP0289 | SP0289 |
| SP0437 | SP1876 |
| SP0437 | SP0438 |
| SP0436 | SP1577 |
| SP0436 | SP0764 |
| SP0436 | SP0261 |
| SP0436 | SP0231 |
| SP0438 | SP1907 |
| SP0438 | SP0516 |
| SP0438 | SP0519 |
| SP0438 | SP0476 |

|        |        |
|--------|--------|
| SP0438 | SP2112 |
| SP0438 | SP2078 |
| SP0438 | SP1875 |
| SP0438 | SP1699 |
| SP0438 | SP1577 |
| SP0438 | SP1542 |
| SP0438 | SP1377 |
| SP0438 | SP1371 |
| SP0438 | SP1362 |
| SP0438 | SP1278 |
| SP0438 | SP1168 |
| SP0438 | SP1159 |
| SP0438 | SP1128 |
| SP0438 | SP1103 |
| SP0438 | SP1090 |
| SP0438 | SP1014 |
| SP0438 | SP0959 |
| SP0438 | SP0766 |
| SP0438 | SP0713 |
| SP0438 | SP0702 |
| SP0438 | SP0701 |
| SP0438 | SP0669 |
| SP0438 | SP0438 |
| SP0438 | SP0437 |
| SP0438 | SP0436 |
| SP0438 | SP0261 |
| SP0438 | SP0231 |
| SP0476 | SP1362 |
| SP0476 | SP0476 |
| SP0476 | SP0261 |
| SP1090 | SP1877 |
| SP1090 | SP1090 |
| SP1278 | SP0519 |
| SP1278 | SP1577 |
| SP1278 | SP1278 |
| SP1278 | SP1128 |
| SP1278 | SP1103 |
| SP1278 | SP0764 |
| SP1278 | SP0438 |
| SP1278 | SP0261 |
| SP1577 | SP1906 |
| SP1577 | SP1577 |
| SP1577 | SP1362 |
| SP1577 | SP1159 |
| SP1577 | SP0436 |
| SP1577 | SP0261 |
| SP1377 | SP0519 |
| SP1377 | SP1577 |
| SP1377 | SP0261 |
| SP0261 | SP1090 |

|        |        |
|--------|--------|
| SP0261 | SP0959 |
| SP0261 | SP0261 |
| SP1168 | SP0519 |
| SP1168 | SP0261 |
| SP1699 | SP0519 |
| SP1699 | SP1699 |
| SP1699 | SP0261 |
| SP0019 | SP0519 |
| SP0019 | SP0261 |
| SP0019 | SP0019 |
| SP0894 | -      |
| SP2121 | -      |
| SP2229 | -      |

The last 3 are proteins with no interacting partners.

**Supplementary Table 4** - Expression levels do not bias the interactions.

| <b>Clone</b> | <b>High end</b> | <b>Clone</b> | <b>Low end</b> |
|--------------|-----------------|--------------|----------------|
| SP0019       | 5               | SP1278       | 11             |
| SP1159       | 3               | SP0959       | 4              |
| SP1168       | 3               | SP1577       | 10             |
| SP0436       | 2               | SP0894       | 0              |
| SP0437       | 5               | SP2121       | 0              |
| SP1014       | 0               | SP0764       | 2              |
| SP0231       | 5               | SP1876       | 5              |
| SP0702       | 6               | SP2229       | 0              |
| SP0289       | 7               | SP1377       | 7              |
| SP0669       | 6               | SP1362       | 3              |
| Average      | 4.2             |              | 4.2            |
| STD          | 2.2             |              | 4.0            |

We compared the average number of interactions per protein for 10 proteins from the low end and 10 proteins from the high end of the protein expression distribution. The average number of interactions per protein is the same.

## SUPPLEMENTARY METHODS

### Device fabrication

The device was designed in AutoCAD2004 (Autodesk, Inc.) and each layer reproduced as a chrome mask at 40,000 dpi (Fineline-Imaging). Flow molds were fabricated on 4" silicon wafers (Silicon Quest International) coated with hexamethyldisilazane (HMDS) in a vapour bath for 2min. The wafers were then spin-coated with SPR 220-7 (Shipley) initially at 500 rpm for 5s followed by 1800 rpm for 60s yielding a substrate height of around 9-11 $\mu$ m. The molds were baked at 115C for 90s followed by a 30s I-line exposure on a MA6 contact mask aligner (Karl Suss). Next the molds were developed with 1:5 2401 developer (Microposit) in H<sub>2</sub>O. Finally the molds were annealed at 120C for 20 min. Control molds were fabricated on 4" silicon wafers by spin coating SU-8 2025 (MicroChem) at 2700 rpm for 80s followed by a 65C bake for 2 min, 95C for 5min and a final step of 65C for 2 min. The wafers were then exposed for 10s on the I-line, followed by a post-exposure bake series of 65C for 2 min, 95C for 15min and 65C for 2 min. The wafers were then developed in SU-8 developer for 90s followed by an acetone and isopropanol wash. The microfluidic devices were fabricated essentially as described previously<sup>1</sup>.

### Linear expression template synthesis

Linear expression templates were generated by a three step PCR method (SI Figure 1) in which the first step amplifies the target sequence the second step adds required 5'UTR and 3'UTR for efficient in vitro transcription and translation and the third step amplifies the expression template. *S. pneumoniae* protein open reading frames were cloned by TIGR into pDONR221 Gateway entry vectors. Two libraries of prey and bait were generated: In the first the preys were tagged with a c-terminal 6-His tag and the baits were tagged with an N-terminal c-myc and C-terminal T7 tag. In the second set the 6-His and T7 tags were switched between prey and bait for detecting reciprocal interactions.

The first step PCR reaction was performed directly on bacteria clones and contained 1 $\mu$ M of each Gateway specific primer (table V), 200 $\mu$ M of each dNTP and 2.5 units of TAQ enzyme mixture (Expand High Fidelity PCR system, Roche) in a final volume of 25 $\mu$ L. The reaction was cycled for 4 min at 94C, followed by 30 cycles of 30s at 94C, 60s at 55C and 180s at 72C

and a final extension of 7 min at 72C. The products then served as templates in the second PCR reaction using 2µL first PCR product, 5 nM 5'ext1 primer (table V), 5 nM 3'ext2 primer (table V), 200µM of each dNTP and 2.5 units of Hi-Fi enzyme mixture (Expand High Fidelity PCR system, Roche) in a final volume of 100µL. The reaction was cycled for 4 min at 94C followed by 10 cycles of 30s at 94C, 60s at 55C and 90s at 72C. After this round of extension 2µL of 5µM Cy3-labeled 5'final and 5µM 3'final in dH<sub>2</sub>O were added to each reaction and cycling was continued immediately for 30 cycles of 30s at 94C, 60s at 50C and 180s at 72C followed by a final extension of 72C for 7 min. The final product was then purified on a Millipore µ96 filter plate and eluted with H<sub>2</sub>O 50µL. Bovine serum albumin (BSA) in H<sub>2</sub>O was added to a final concentration of 1%. Fidelity of this method was previously demonstrated by Maerkl and Quake<sup>2</sup>.

Designation and sequence of DNA oligo's used for creating the linear expression templates:

(1) 5'-ORF, TTGTTTAACTTTAAGAAGGAGATATAACCATGCCAACTTTGTACAAAAAAGCAG;

(2) 5'-cMyc,

GTAGCAGCCTGAGTCGTTATTAGTGATGGTGATGGTGATGAACTTTGTACAAGAAAGCTGGGT

(3) 3'-T7,

TTGTTTAACTTTAAGAAGGAGATATAACCATGGAACAAAAATTGATAAGTGAGGAAGATTTACCAACTT  
TGTACAAAAAAGCAG

(4) 3'-HIS-ORF,

GTAGCAGCCTGAGTCGTTATTATCCCATTTGTTGACCCCCTGTCATACTTGCCATAACTTTGTACAAGA  
AAGCTGGGT

(5) 5' 4-HIS-GFP,

TTGTTTAACTTTAAGAAGGAGATATAACCATGCATCACCATCACGTGAGCAAGGGCGA

(6) 5' 5-HIS-GFP,

TTGTTTAACTTTAAGAAGGAGATATAACCATGCACCATCACCATCACGTGAGCAAGGGCGA

(7) 3' GFP, GTAGCAGCCTGAGTCGTTATTACTTGTACAGCTCGTCCAT

(8) 5'UTR,

GATCTTAAGGCTAGAGTACTAATACGACTCACTATAGGGAGACCACAACGGTTTCCCTCTAGAAATAA  
TTTTGTTTAACTTTAAGAAGGAGATATAACC

(9) 3'UTR,

CAAAAAACCCCTCAAGACCCGTTTAGAGGCCCAAGGGGTTATGCTAGTTTTTTTTTTTTTTTTTTTTTTT  
TTTTTTTTGTAGCAGCCTGAGTCG

(10) 5'Final-Cy3, GATCTTAAGGCTAGAGTAC

(11) 3'Final, CAAAAAACCCTCAAGAC

First 4 oligo's were used for extracting the open reading frames out of the Gateway vector (Invitrogen). Oligos 5-7 were used to create a linear template for the expression of 4- and 5-HIS tagged eGFP. Oligo's 8-9 were used for adding the 5' and 3' UTRs onto the linear templates. The last 2 oligo's were used to amplify the linear expression template.

### **DNA arraying and device alignment**

Expression templates were spotted with an OmniGrid Micro (GeneMachines) microarrayer using a CMP3B pin (TeleChem International, Inc.) for delivery onto epoxy coated glass substrates (CEL Associates). Each sample solution contained 1% BSA in H<sub>2</sub>O to prevent covalent linkage of the target DNA to the epoxy functional groups as well as for visualization during alignment. After spotting the arrays were quality controlled on a GenePix4000B (Molecular Devices). The arrays could then be stored in the dark at room temperature until aligned to a microfluidic device. Device alignment was done manually on a SMZ1500 (Nikon) stereoscope and bonded overnight on a heated plate at 40C.

### **Surface chemistry, protein synthesis and MITOMI**

All devices were driven between 10 and 15 psi in the control line and 6 psi for the flow line. For the initial surface derivatization steps the chamber valves remained closed to prevent liquid from entering the chambers containing the spotted DNA targets. First, all accessible surface area was derivatized by flowing a solution of biotinylated BSA (Pierce) resuspended to 2 mg/mL in H<sub>2</sub>O for 30 min followed by a 5 min PBS wash. Next a 0.5 mg/mL Neutravidin (Pierce) solution in PBS was flown for 30 min, followed by a 5 min PBS wash. The "button" membrane was closed and the PBS wash continued for an additional 5 min. Then all remaining accessible surface area was passivated with biotinylated BSA for 30 min, followed by a 10 min PBS wash. Finally a 1:4 solution of biotinylated-penta-histidine (Qiagen) or biotinylated anti T7 antibody (EMD Biosciences) in 2% BSA in PBS was loaded for 2-5 min, after which the "button" membrane was opened and flow continued for 30 min, again followed by a 10 min PBS completing the surface derivatization procedure.

Next a 25 $\mu$ L T7 coupled RTS HY Escherichia coli extract mixture (Roche) spiked with an extra 0.5  $\mu$ l of T7 RNA polymerase (Promega) was prepared and loaded onto the device. The device was flushed for 5 min, after which the chamber valves were opened allowing for dead end filling of the chambers with extract. The chamber valves were again closed and flushing continued for an additional 5 min. Next the segregation valves separating each unit cell were closed followed by opening of the chamber valves allowing for equilibration of the unit cell by diffusion. The entire device was heated to 30C on a temperature controlled microscope stage and incubated for up to 2.5hrs.

We then performed a modified version of MITOMI by closing the “button” membrane as well as the chamber valves. We washed for 5 min with PBS, followed by 5 min with detection antibodies (cy3-labeled anti c-myc (1:1000) and either Alexa647-labeled anti T7 or anti penta-Histidine (1:1000)) mixed with PBS and 2% BSA. We then lifted the “button” and closed the segregation valves and the chamber valves. The proteins were allowed to equilibrate in the presence of the antibodies for 20 min, after which the “button” and chamber valves were closed again and the segregation valve lifted. The device was washed for 5 min with PBS and imaged to detect trapped molecules on an ArrayWorx<sup>e</sup> (Applied Precision). Overall, we performed two scans of the 43 by 43 matrix with 4 repeats each using 8 devices (2400 chambers each), a total of 14792 unit cells excluding controls for bait only and prey only.

### **Image and Data Analysis**

For each experiment two images were analyzed with GenePix3.0 (Molecular Devices). The first image (cy3 channel) was used to determine relative bait concentrations and the second image (Alexa647 channel) was used to determine bound prey concentrations. Columns of prey only and rows of bait only were used to assess non-specific binding of prey and bait proteins to the surface. Each row and column was then normalized by subtracting the non-specific baseline signal of its prey and bait respectively. A signal that was 2 SD above the average noise was considered an interaction. Only bidirectional interactions (interactions that were positive in reciprocal scans with both 6-his and T7 tagged baits) were considered positive. Reproducibility of positive interactions was approximately 95%. A protein network was constructed using the Cytoscape software<sup>3</sup>.



### **Co-immunoprecipitation experiments**

Prey and bait proteins were co-expressed in a 50 $\mu$ L of Roche RTS HY extract for 2.5hrs at 30C and 600 rpm (Roche RTS Proteomaster). As a control for non-specific binding of prey and antibody to the beads, preys were expressed in the absence of bait. Next, 1 $\mu$ L of Ni-NTA agarose magnetic beads (Qiagen) and Alexa647-labeled anti T7 antibody (final dilution 1:1000) were added. Mixture was incubated for an additional 15 min. Beads were then pulled down with a magnet and washed once with 250 $\mu$ L of PBS. Proteins were then eluted from the beads using 200 mM imidazole in PBS. The soluble Alexa647 probe from each reaction was read on a fluorimeter (Shimadzu RS 5301PC) in duplicates. Excitation was set to 647 nm and emission set to 670 nm, both with 5 nm slits. Alexa647 signal after subtraction of the respective control reaction is proportional to the strength of the interaction between the corresponding prey and bait. Overall, we tested 13 prey and bait pairs with 6 known interactions, 6 unknown interactions and 1 non-interacting pair as a negative control. The experiment was repeated twice.

### **Determining eGFP concentrations**

A linear template for 4- and 5- HIS tagged eGFP were constructed using the PCR method described above (SI table V). The constructs were expressed in vitro with the Roche RTS 100 kit in a 50 ul volumes and their concentrations in the extract were determined using the eGFP fluorescence. For this purpose we made an eGFP calibration curve from a stock of pure eGFP 1mg/ml (Biovision) SI Figure 2.

### **Determining 4-HIS eGFP binding constant**

In order to find the sensitivity of PING we did the following experiment: We flowed a series of increasing 4-HIS GFP (or 5-HIS eGFP) concentrations on a device with a Penta-HIS antibody (Qiagen) surface chemistry. Each concentration was flowed into two channels for 5 min each with a total of 8 different concentrations. Hepes 50mM was used as concentration 0. We then incubated the eGFPs in the presence of the antibody for 30 min. MITOMI was performed and the results were imaged. The binding constant of 4-HIS eGFP to the Penta-HIS antibody was determined by a non-linear least square fitting to  $F = F_{max} * [C] / (K_d + [C])$ , where F is the

fluorescence intensities obtained from PING,  $C$  is the concentration of 4-HIS eGFP and  $K_d$  is the binding constant.

### Supplementary References

1. Thorsen, T., Maerkl, S.J. & Quake, S.R. Microfluidic large-scale integration. *Science* **298**, 580-584 (2002).
2. Maerkl, S.J. & Quake, S.R. A systems approach to measuring the binding energy landscapes of transcription factors. *Science* **315**, 233-237 (2007).
3. Shannon, P., *et al.* Cytoscape: a software environment for integrated models of biomolecular interaction networks. *Genome research* **13**, 2498-2504 (2003).
